# Supplementary material for: The Combined QBO and ENSO Influence on Tropical Cyclone Activity over the North Atlantic Ocean
Source: MDPI journal article supplement (doi:10.3390/atmos12121588), 2021-11-29
Supplement: s1 [file s1]

Archive with 1 entries (1 files):
- atmosphere-1465772-supplementary.pdf
